# Supplementary material
Source: HighWire-hosted journal article supplement (https://gut.bmj.com/content/gutjnl-2018-317071)

**Figure S2**

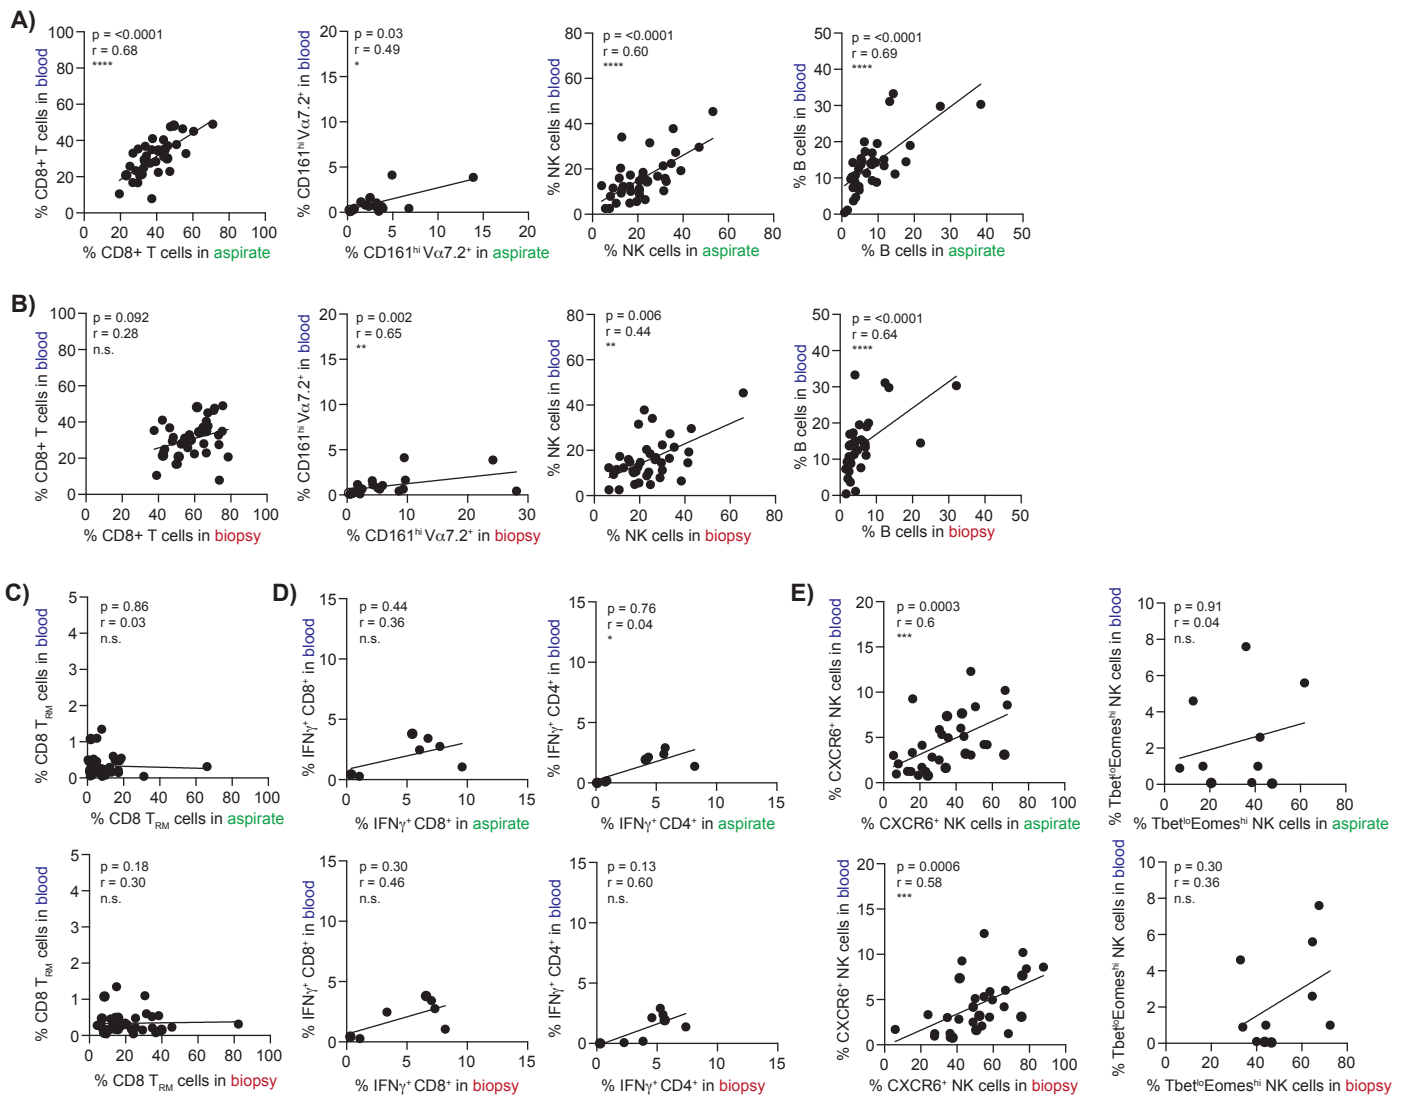

Supplement: inline-supplementary-material-3 [file inline-supplementary-material-3.pdf]
